# Supplementary material for: The non-coding snRNA 7SK controls transcriptional termination, poising, and bidirectionality in embryonic stem cells
Source: PubMed Central journal article supplement (PMC4053805; doi:10.1186/gb-2013-14-9-r98), 2013-09-17
Supplement: gb-2013-14-9-r98-S2.pdf [file gb-2013-14-9-r98-S2.pdf]

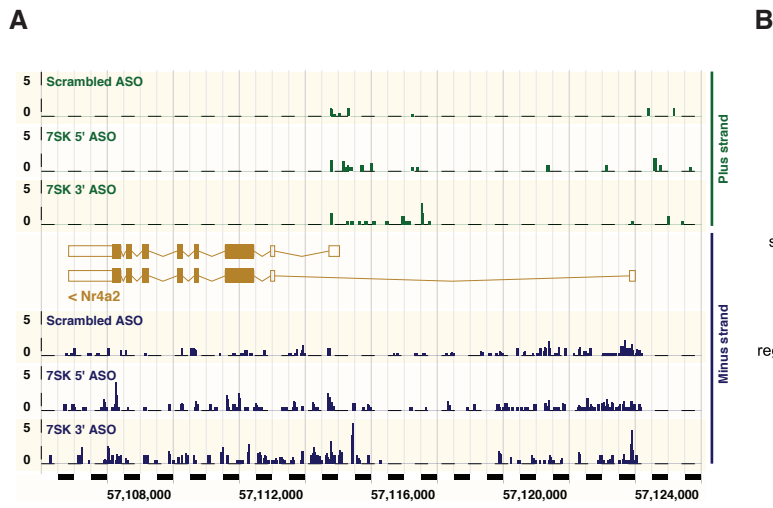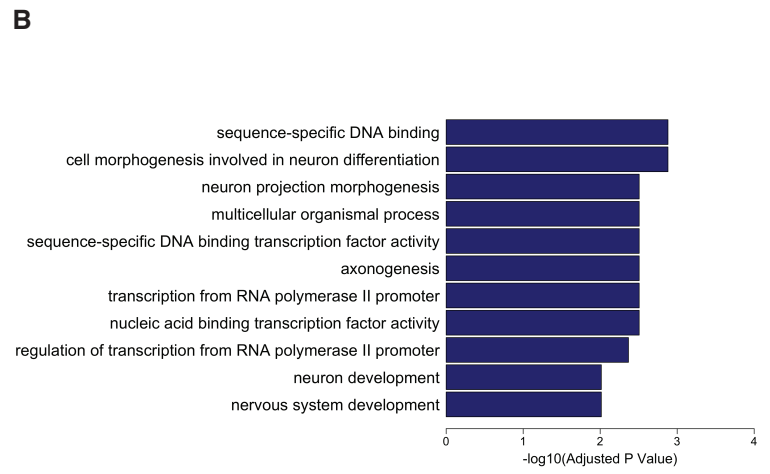

### Supplementary Figure 2

**(a)** Ensembl genome browser screenshot showing normalized RNA-seq read coverage (mean of the two biological replicates) at the *Nr4a2* (*Nurr1*) locus. Plus (green) and minus (blue) strand reads are displayed in separate tracks.

**(b)** Gene ontology terms associated with 7SK-regulated genes. Enrichment *P*-values were adjusted using the Benjamini and Hochberg multiple testing correction method.
