# Supplementary material for: The non-coding snRNA 7SK controls transcriptional termination, poising, and bidirectionality in embryonic stem cells
Source: PubMed Central journal article supplement (PMC4053805; doi:10.1186/gb-2013-14-9-r98), 2013-09-17
Supplement: gb-2013-14-9-r98-S5.pdf [file gb-2013-14-9-r98-S5.pdf]

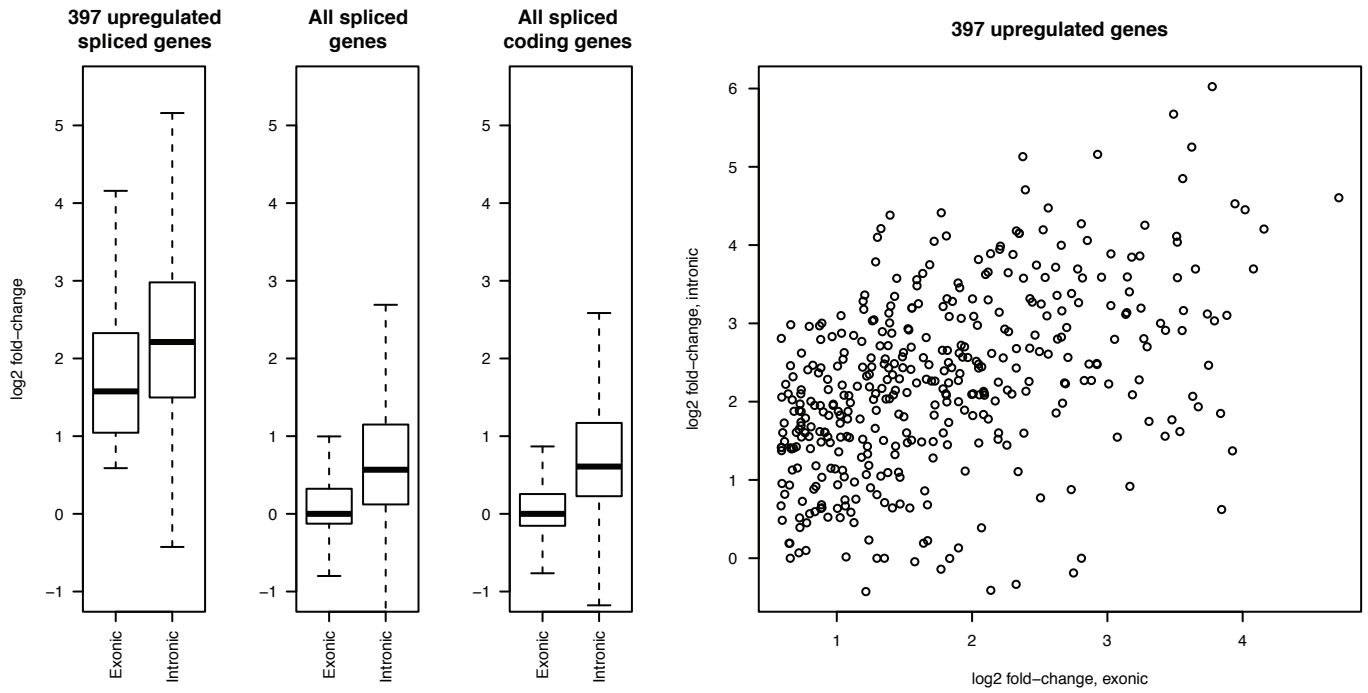

### Supplementary Figure 3

Box plots and scatter plot depicting  $\log_2$  fold changes measured by RNA-seq upon 7SK knockdown in mouse ES cells, by counting reads over exons and introns. Of the 438 genes found to be upregulated upon 7SK knockdown, only those with introns are shown (397).
