# Supplementary material for: The non-coding snRNA 7SK controls transcriptional termination, poising, and bidirectionality in embryonic stem cells
Source: PubMed Central journal article supplement (PMC4053805; doi:10.1186/gb-2013-14-9-r98), 2013-09-17
Supplement: gb-2013-14-9-r98-S13.pdf [file gb-2013-14-9-r98-S13.pdf]

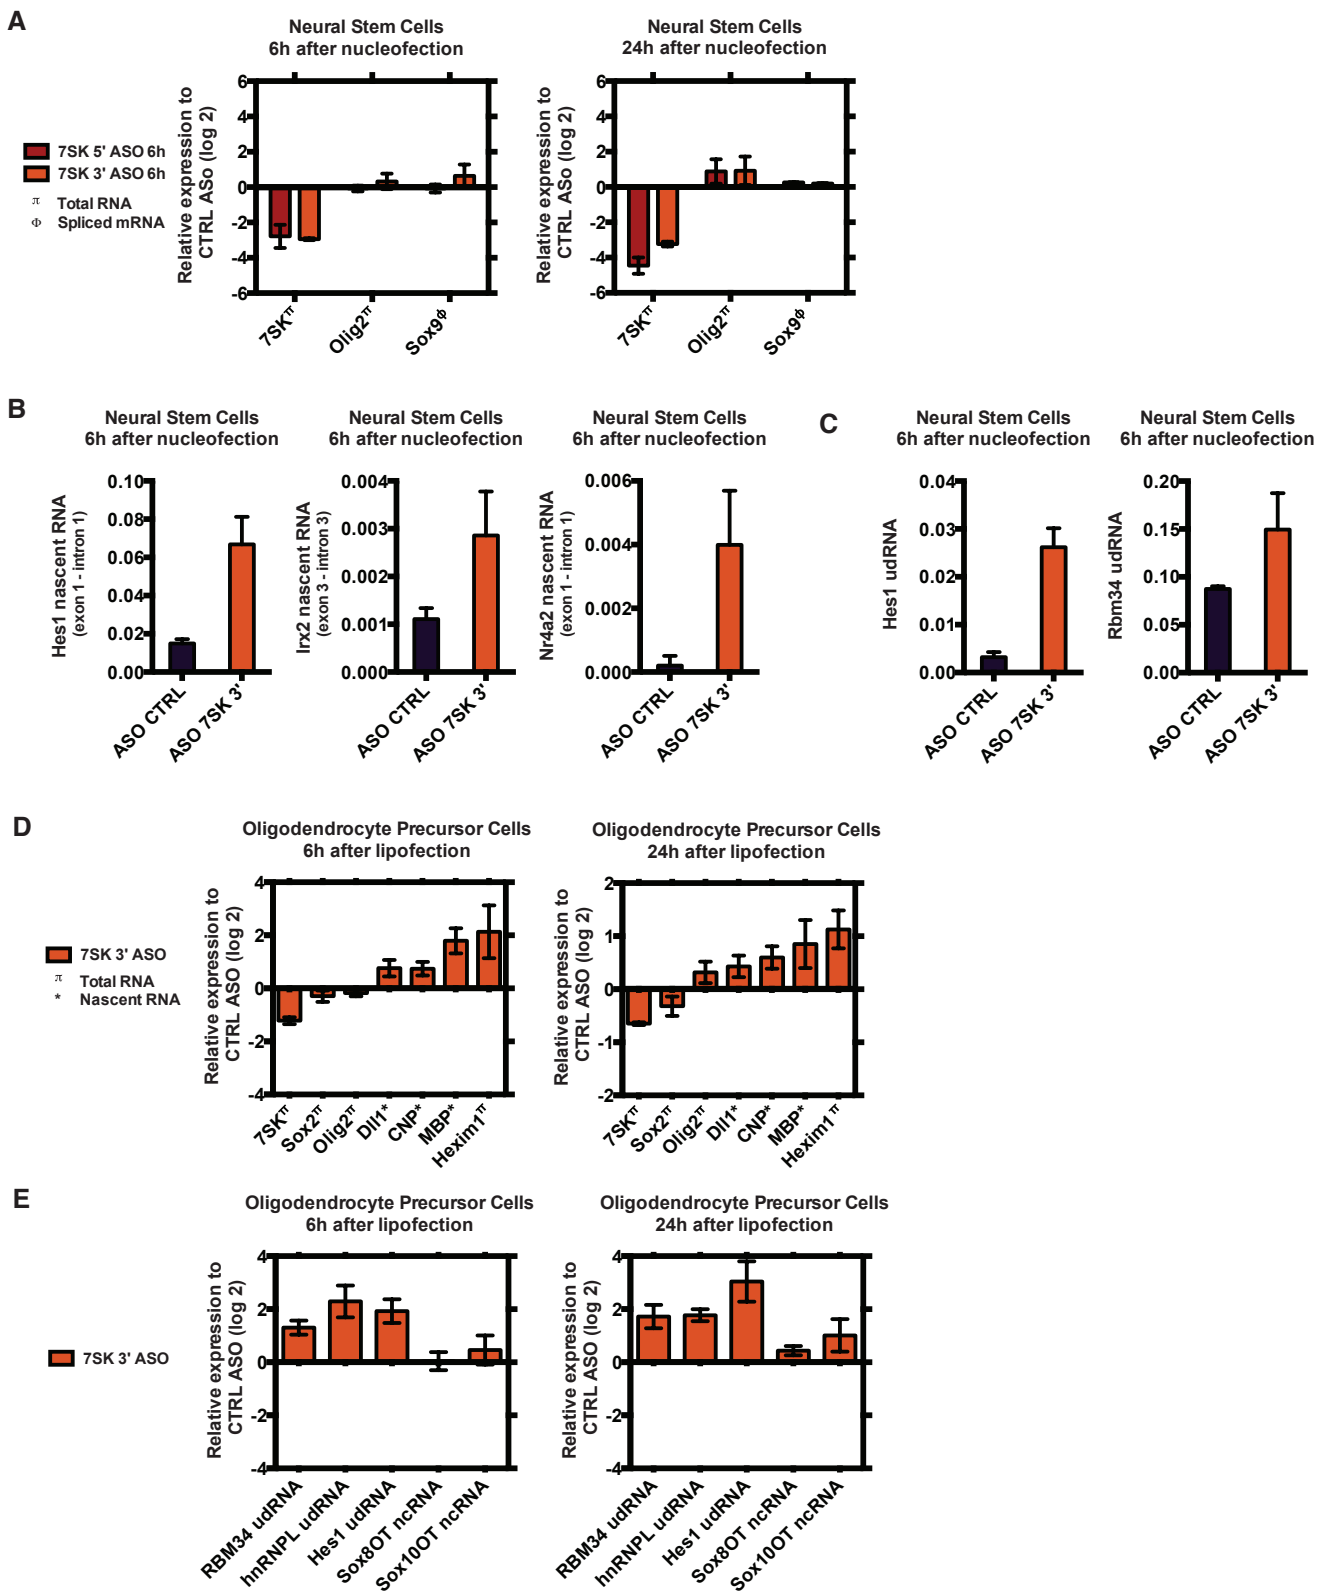

### Supplementary Figure 7

(a) qRT-PCR analysis of *7SK* and *Olig2* total RNA, and *Sox9* mRNA levels upon nucleofection of NS cells with 7SK 5' and 3' ASOs compared to scrambled and GFP ASOs (CTRL). NS cells were replated after nucleofection and collected after 6 and 24hours. Error bars represent SEM for 2 independent experiments. (b,c) qRT-PCR analysis of *Hes1*, *Irx2* and *Nr2a4* nascent RNA (b) and *Hes1* and *Rbm34* udrRNA (c) upon nucleofection of NS cells with 7SK 3' ASOs compared to scrambled ASO (CTRL). NS cells were replated after nucleofection and collected after 6 hours. Error bars represent SD of qPCR technical replicates. (d, e) qRT-PCR analysis of *7SK*, *Sox2*, *Hexim1* and *Olig2* total RNA, and *Dll1*, *CNP* and *MBP* nascent RNA (d) and *Rbm34*, *hnRNPL* and *Hes1* udrRNA, *Sox8OT* (AK079380) total and *Sox10OT* (Gm10863) spliced RNA (e) upon lipofection of Oli-neu OPC cells with 7SK 3' ASOs compared to scrambled ASO (CTRL). OPCs were collected after 6 and 24 hours. Error bars represent SEM for 3 independent experiments.
